# Supplementary material for: Linoleic Acid-Enriched Diet Increases Mitochondrial Tetralinoleoyl Cardiolipin, OXPHOS Protein Levels, and Uncoupling in Interscapular Brown Adipose Tissue during Diet-Induced Weight Gain
Source: MDPI journal article supplement (doi:10.3390/biology12010009), 2022-12-21
Supplement: s1 [file s1]

## Supplementary Materials

**Table S1.** Diet composition of Lard (LD) and Safflower Oil (SO) diets.

| Ingredient, % (grams)    | Lard (LD) diet | Safflower oil (SO) diet |
|--------------------------|----------------|-------------------------|
| Casein                   | 200            | 200                     |
| L-Cystine                | 3              | 3                       |
| Corn starch              | 72.8           | 72.8                    |
| Maltodextrin 10          | 100            | 100                     |
| Sucrose                  | 172.8          | 172.8                   |
| Cellulose                | 50             | 50                      |
| Lard                     | 179.5          | 0                       |
| Safflower Oil, USP       | 23             | 202.5                   |
| Mineral Mix S10026       | 10             | 10                      |
| Dicalcium phosphate      | 13             | 13                      |
| Potassium citrate, 1 H2O | 16.5           | 16.5                    |
| Choline bitartrate       | 2              | 2                       |
| Protein                  | 24             | 24                      |
| Carbohydrate             | 41             | 41                      |
| Fat                      | 24             | 24                      |
| Kilocalories             | 4057           | 4057                    |
| Total grams              | 858.15         | 858.15                  |

Diet composition of Lard (LD) and Safflower Oil (SO) diets, which are 24% fat by weight (g) and 45% by kilocalories.

**Table S2.** Fatty acid profile of LD and SO diets.

| Fatty Acid (%)               | Lard (LD) diet | Safflower oil (SO) diet |
|------------------------------|----------------|-------------------------|
| Myristic acid (C14:0)        | 1.27 ± 0.03    | 0.204 ± 0.02            |
| Palmitic acid (C16:0)        | 21.7 ± 0.06    | 7.29 ± 0.04             |
| Palmitoleic acid (C16:1n7)   | 1.63 ± 0.01    | 0.18 ± 0.03             |
| Stearic acid (C18:0)         | 11.3 ± 0.08    | 2.66 ± 0.24             |
| Oleic acid (C16:1n9)         | 35.9 ± 0.09    | 14.5 ± 0.56             |
| Linoleic acid (C18:2n6)      | 26.2 ± 0.17    | 74.8 ± 1.25             |
| Linolenic acid (C18:3n3)     | 0.93 ± 0.02    | 0.17 ± 0.02             |
| Eicosenoic Acid (C20:1n9)    | 0.55 ± 0.02    | 0.17 ± 0.01             |
| Eicosadienoic acid (C20:2n6) | 0.04 ± 0.00    | 0.04 ± 0.02             |

LD: Lard; SO: safflower oil; Dietary oils (n = 3 samples / group) were analyzed by gas chromatography and expressed as the mean percent ± SD of total fatty acids. All samples have a coefficient of variation of <3% between 3 experimental replicates.

**Table S3.** Tissue weight expressed as a percentage of total body weight and food consumption characteristics of mice after long-term feeding of LD and SO diets. .

| Tissue or measurement                   | Lard (LD) diet | Safflower oil (SO) diet | p-value |
|-----------------------------------------|----------------|-------------------------|---------|
| Heart (% body weight)                   | 0.393 ± 0.018  | 0.410 ± 0.019           | 0.54    |
| Liver (% body weight)                   | 3.82 ± 0.138   | 4.05 ± 0.213            | 0.50    |
| Quadriceps (% body weight)              | 1.06 ± 0.044   | 1.08 ± 0.052            | 0.72    |
| Gastrocnemius plantaris (% body weight) | 0.790 ± 0.045  | 0.827 ± 0.046           | 0.58    |
| Inguinal adipose (% body weight)        | 3.23 ± 0.456   | 2.42 ± 0.236            | 0.13    |

|                                    |               |               |      |
|------------------------------------|---------------|---------------|------|
| Epididymal adipose (% body weight) | 5.19 ± 0.339  | 5.55 ± 0.334  | 0.46 |
| Brown adipose (% body weight)      | 0.511 ± 0.064 | 0.498 ± 0.057 | 0.88 |
| Cumulative food intake (g)         | 269 ± 2.54    | 258 ± 6.56    | 0.15 |
| Food efficiency ratio              | 0.014 ± 0.004 | 0.035 ± 0.004 | 0.28 |

LD: Lard; SO: safflower oil; data are presented as mean percent ± SEM of body weight. Food efficiency ratio is the increase in body weight (g) standardized to cumulative food intake (g). A Student's t-test was used to determine statistical significance between diet groups, with  $p < 0.05$ . N = 7-12/group.

**Table S4.** Predominant CL species in murine heart mitochondria during long-term consumption of LD or SO diets.

| CL m/z ratio | Predominant acyl species                | LD Diet (% of total CL) | SO Diet (% of total CL) | p-value |
|--------------|-----------------------------------------|-------------------------|-------------------------|---------|
| 1448         | (18:2) <sub>4</sub>                     | 32.8 ± 1.08             | 57.6 ± 0.92 *           | <0.01   |
| 1450         | (18:1) (18:2) <sub>3</sub>              | 18.0 ± 0.17             | 18.46 ± 0.53 *          | <0.01   |
| 1474         | (18:1) (18:2) <sub>2</sub> (20:4)       | 9.51 ± 0.30             | 7.55 ± 0.67 *           | <0.01   |
| 1498         | (18:1) (18:2) <sub>2</sub> (22:6)       | 8.79 ± 0.30             | 4.55 ± 0.67 *           | <0.01   |
| 1496         | (18:2) <sub>3</sub> (22:6)              | 9.91 ± 0.51             | 2.50 ± 0.76 *           | < 0.01  |
| 1452         | (18:1) <sub>2</sub> (18:2) <sub>2</sub> | 7.36 ± 0.35             | 4.20 ± 0.18 *           | 0.01    |
| 1470         | (18:2) <sub>3</sub> (20:5)              | 3.41 ± 0.05             | 4.41 ± 0.23 *           | <0.01   |
| 1500         | (18:1) <sub>2</sub> (18:2) (22:6)       | 3.46 ± 0.24             | 1.94 ± 0.26 *           | <0.01   |
| 1472         | (18:2) <sub>3</sub> (20:4)              | 3.04 ± 0.15             | 2.09 ± 0.11 *           | <0.01   |
| 1422         | (16:1) (18:2) <sub>3</sub>              | 1.56 ± 0.10             | 0.75 ± 0.09 *           | <0.01   |

LD: Lard; SO: safflower oil; data are presented as average ± SEM; an unpaired 2-tailed t-test was used to determine significant differences ( $p < 0.05$ ) in CL species between diet groups. Asterisks indicate a significant change in CL species between diet groups; respective p-values are listed. N = 4 per group.

**Table S5.** Predominant CL species in murine gastrocnemius plantaris mitochondria during long-term consumption of LD or SO diets.

| CL m/z ratio | Predominant acyl species                | LD Diet (% of total CL) | SO Diet (% of total CL) | p-value |
|--------------|-----------------------------------------|-------------------------|-------------------------|---------|
| 1448         | (18:2) <sub>4</sub>                     | 20.17 ± 1.05            | 27.91 ± 1.27 *          | <0.01   |
| 1450         | (18:1) (18:2) <sub>3</sub>              | 13.26 ± 0.42            | 14.19 ± 0.70            | 0.32    |
| 1452         | (18:1) <sub>2</sub> (18:2) <sub>2</sub> | 7.98 ± 0.67             | 6.76 ± 0.42             | 0.20    |
| 1498         | (18:1) (18:2) <sub>2</sub> (22:6)       | 6.12 ± 0.04             | 5.76 ± 0.31             | 0.32    |
| 1474         | (18:1) (18:2) <sub>2</sub> (20:4)       | 5.95 ± 0.41             | 4.51 ± 0.18 *           | 0.03    |
| 1496         | (18:2) <sub>3</sub> (22:6)              | 6.52 ± 0.30             | 4.66 ± 0.27 *           | 0.01    |
| 1472         | (18:2) <sub>3</sub> (20:4)              | 5.17 ± 0.90             | 4.40 ± 0.37             | 0.48    |
| 1470         | (18:2) <sub>3</sub> (20:5)              | 4.01 ± 1.31             | 5.51 ± 0.22             | 0.32    |
| 1476         | (18:1) <sub>2</sub> (18:2) (20:4)       | 4.20 ± 0.23             | 5.15 ± 0.02 *           | 0.01    |
| 1500         | (18:1) <sub>2</sub> (18:2) (22:6)       | 3.56 ± 0.07             | 3.12 ± 0.13 *           | 0.04    |
| 1426         | (16:1) (18:1) <sub>2</sub> (18:2)       | 3.80 ± 0.16             | 2.78 ± 0.12 *           | <0.01   |
| 1478         | (18:1) <sub>3</sub> (20:4)              | 3.31 ± 0.12             | 3.26 ± 0.45             | 0.98    |
| 1422         | (16:1) (18:2) <sub>3</sub>              | 3.31 ± 0.45             | 2.86 ± 0.09             | 0.38    |
| 1424         | (16:1) (18:1) (18:2)                    | 3.16 ± 0.21             | 2.65 ± 0.04             | 0.08    |

LD: Lard; SO: safflower oil; Data are presented as average ± SEM; an unpaired 2-tailed t-test was used to determine significant differences ( $p < 0.05$ ) in CL species between diet groups. Asterisks indicate a significant change in CL specie between diet groups; respective P-values are listed. N = 3 per group.

**Table S6.** Predominant CL species in murine inguinal white adipose tissue (iWAT) during long-term consumption of LD or SO diets.

| CL m/z ratio | Predominant acyl species                | LD Diet (% of total CL) | SO Diet (% of total CL) | <i>p</i> -value |
|--------------|-----------------------------------------|-------------------------|-------------------------|-----------------|
| 1448         | (18:2) <sub>4</sub>                     | 35.03 ± 1.19            | 48.87 ± 1.65 *          | <0.01           |
| 1450         | (18:1) (18:2) <sub>3</sub>              | 18.98 ± 0.63            | 15.57 ± 0.60 *          | <0.01           |
| 1452         | (18:1) <sub>2</sub> (18:2) <sub>2</sub> | 10.51 ± 0.33            | 6.73 ± 0.19 *           | <0.01           |
| 1422         | (16:1) (18:2) <sub>3</sub>              | 6.55 ± 0.41             | 6.41 ± 0.33             | 0.61            |
| 1474         | (18:1) (18:2) <sub>2</sub> (20:4)       | 4.58 ± 0.74             | 4.13 ± 0.29             | 0.59            |
| 1470         | (18:2) <sub>3</sub> (20:5)              | 3.92 ± 0.18             | 4.48 ± 0.48             | 0.32            |
| 1472         | (18:2) <sub>3</sub> (20:4)              | 3.92 ± 0.35             | 3.32 ± 0.07             | 0.14            |
| 1424         | (16:1) (18:1) (18:2)                    | 3.87 ± 0.34             | 2.51 ± 0.18             | 0.01            |
| 1496         | (18:2) <sub>3</sub> (22:6)              | 3.10 ± 0.75             | 2.29 ± 0.78             | 0.48            |
| 1500         | (18:1) <sub>2</sub> (18:2) (22:6)       | 2.47 ± 0.57             | 1.98 ± 0.28             | 0.46            |
| 1454         | (18:1) <sub>3</sub> (18:2)              | 3.11 ± 0.39             | 1.15 ± 0.10 *           | <0.03           |
| 1456         | (18:1) <sub>4</sub>                     | 2.64 ± 0.30             | 1.57 ± 0.36             | 0.059           |
| 1498         | (18:1) (18:2) <sub>2</sub> (22:6)       | 1.32 ± 0.27             | 1.11 ± 0.18             | 0.54            |

LD: Lard; SO: safflower oil; Data are presented as average ± SEM; an unpaired 2-tailed t-test was used to determine significant differences ( $p < 0.05$ ) in CL species between diet groups. Asterisks indicate a significant change in CL species between diet groups; respective *p*-values are listed. N = 4 per group.

**Table S7.** Predominant CL species in murine epididymal white adipose tissue (eWAT) during long-term consumption of LD or SO diets.

| CL m/z ratio | Predominant acyl species                | LD Diet (% of total CL) | SO Diet (% of total CL) | <i>p</i> -value |
|--------------|-----------------------------------------|-------------------------|-------------------------|-----------------|
| 1448         | (18:2) <sub>4</sub>                     | 29.50 ± 1.91            | 32.55 ± 1.23            | 0.65            |
| 1450         | (18:1) (18:2) <sub>3</sub>              | 17.39 ± 0.48            | 14.72 ± 1.23            | 0.09            |
| 1452         | (18:1) <sub>2</sub> (18:2) <sub>2</sub> | 9.52 ± 1.28             | 68.74 ± 0.72*           | 0.62            |
| 1474         | (18:1) (18:2) <sub>2</sub> (20:4)       | 5.50 ± 0.31             | 6.32 ± 0.88             | 0.39            |
| 1456         | (18:1) <sub>4</sub>                     | 5.33 ± 1.38             | 5.72 ± 1.48             | 0.85            |
| 1422         | (16:1) (18:2) <sub>3</sub>              | 6.58 ± 1.01             | 4.11 ± 0.31             | 0.06            |
| 1496         | (18:2) <sub>3</sub> (22:6)              | 5.17 ± 2.76             | 4.54 ± 1.69             | 0.39            |
| 1500         | (18:1) <sub>2</sub> (18:2) (22:6)       | 4.17 ± 0.79             | 5.37 ± 1.53             | 0.51            |
| 1472         | (18:2) <sub>3</sub> (20:4)              | 4.37 ± 0.44             | 4.80 ± 0.67             | 0.61            |
| 1454         | (18:1) <sub>3</sub> (18:2)              | 4.78 ± 0.65             | 3.84 ± 1.04             | 0.85            |
| 1470         | (18:2) <sub>3</sub> (20:5)              | 3.45 ± 0.46             | 3.82 ± 0.26             | 0.51            |
| 1424         | (16:1) (18:1) (18:2)                    | 2.49 ± 0.46             | 2.54 ± 0.14             | 0.093           |

LD: Lard; SO: safflower oil; Data are presented as average ± SEM; an unpaired 2-tailed t-test was used to determine significant differences ( $p < 0.05$ ) in CL species between diet groups. Asterisks indicate a significant change in CL species between diet groups; respective *p*-values are listed. N = 4 per group.

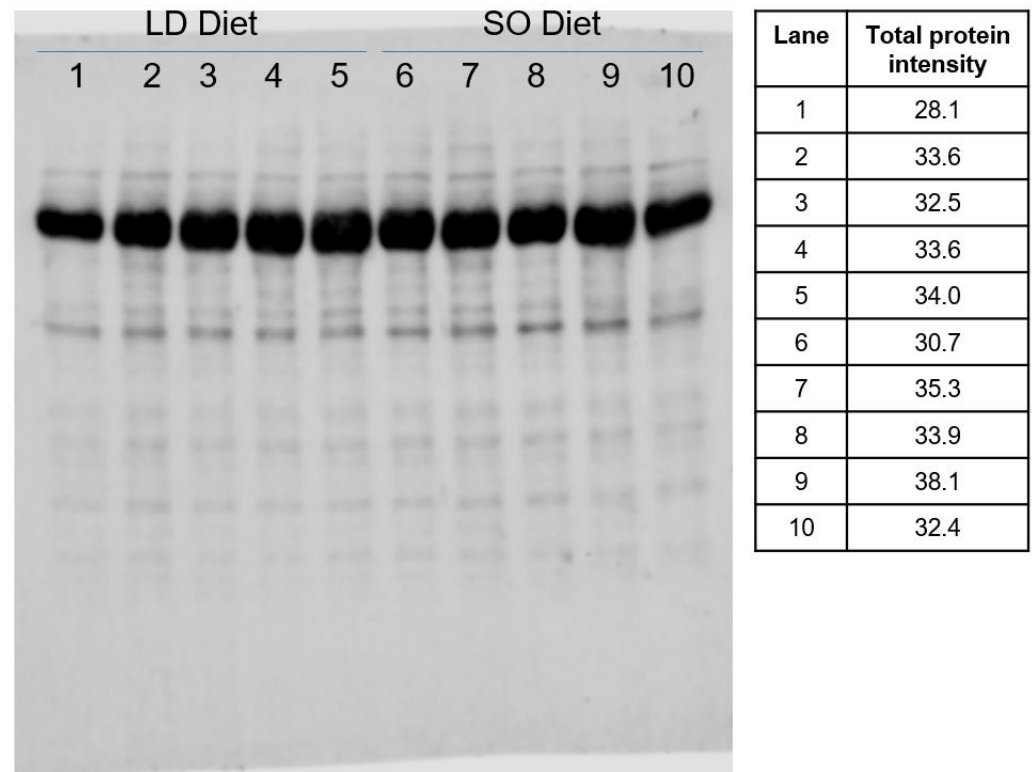

**Figure S1.** Total protein stain used as a loading control for OXPHOS western blot on BAT mitochondrial extracts. Protein intensity was measured using Revert 700 total protein stain (Licor Biosciences, Lincoln, NE, USA), detected using the Licor Odyssey Imager, and densitometric analysis was carried out using the Licor Imager Software (Lincoln, NE, USA). OXPHOS complex protein intensity was standardized to the total protein intensity for each well for relative protein abundance quantified in Figure 4b.

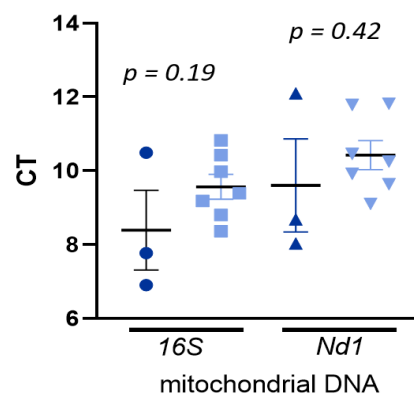

**Figure S2.** Mitochondrial DNA quantification of *mtNd1* and *mt16S* from representative technical replicates to validate relative amounts of mitochondria between samples. Data are expressed as mean  $\pm$  SEM. Two-sample t-tests were used to determine significant differences between diet groups, with  $p < 0.05$ .  $p$ -values are listed in the figure.
